# Supplementary material
Source: PubMed Central journal article supplement (PMC3959288)

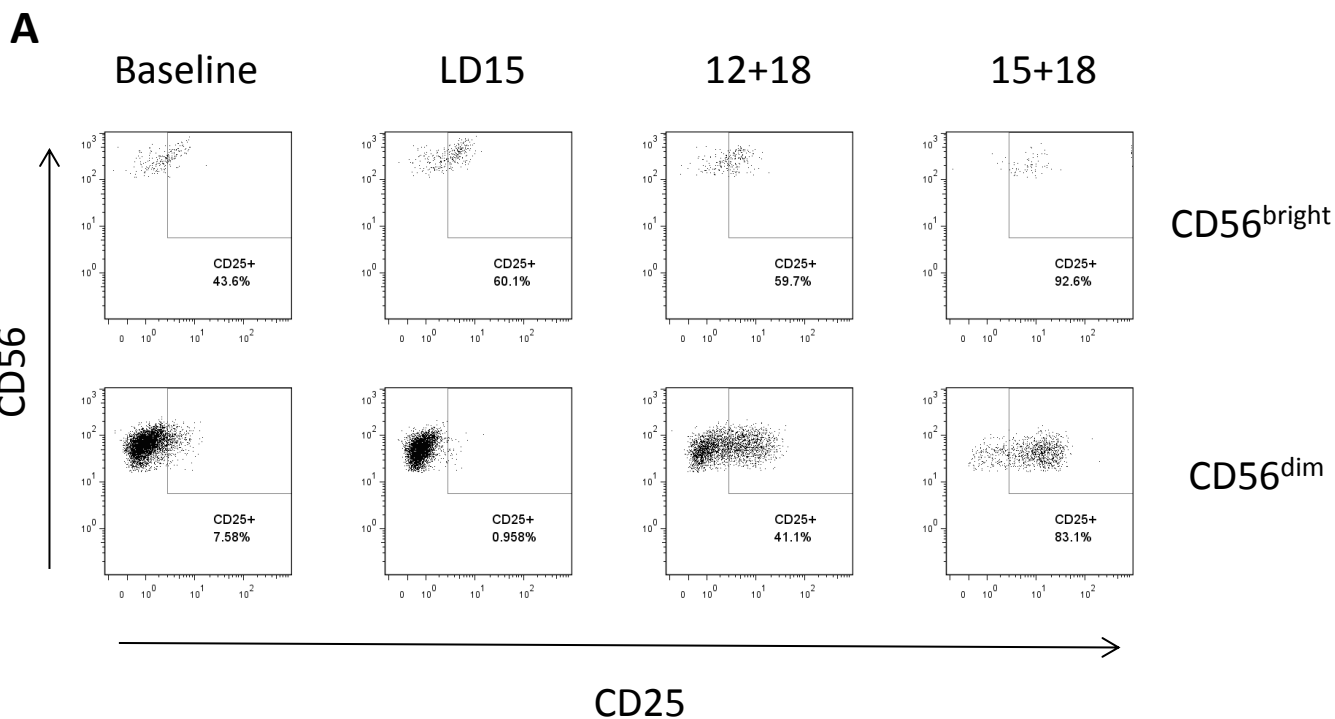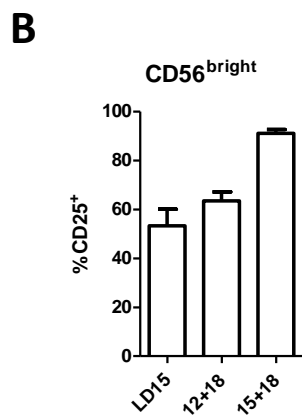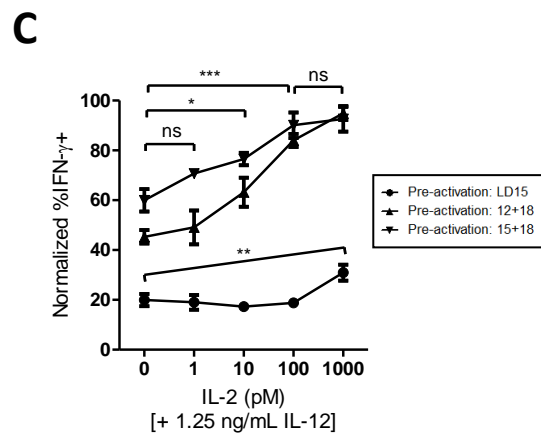

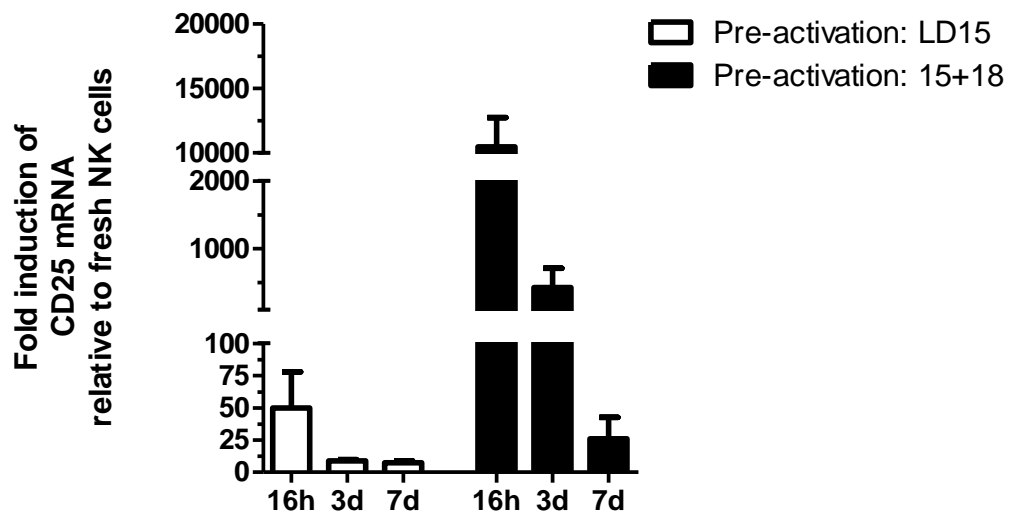

No IL-12

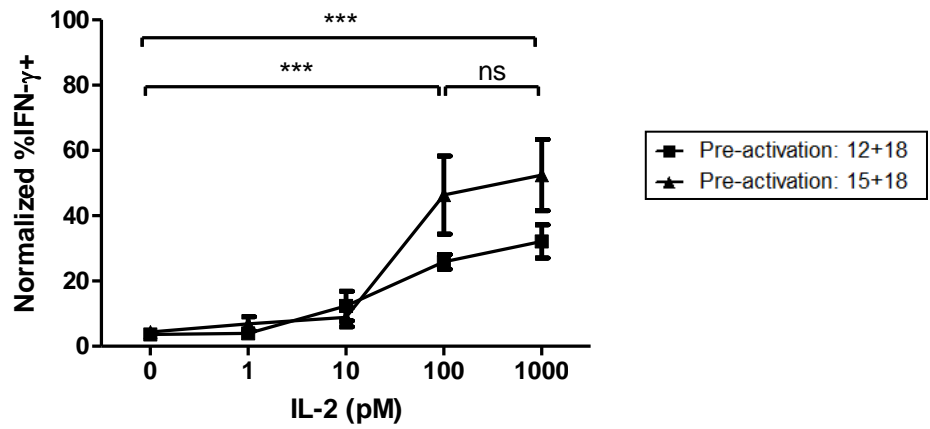

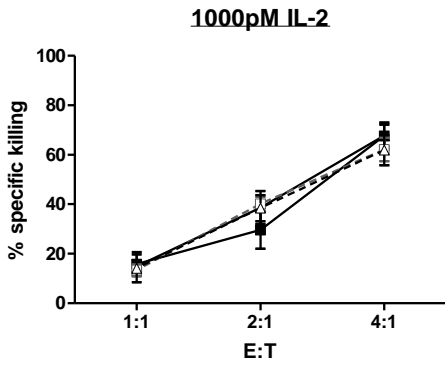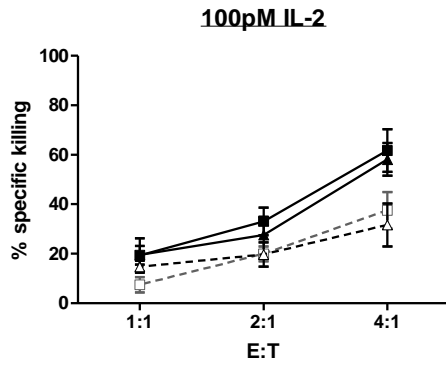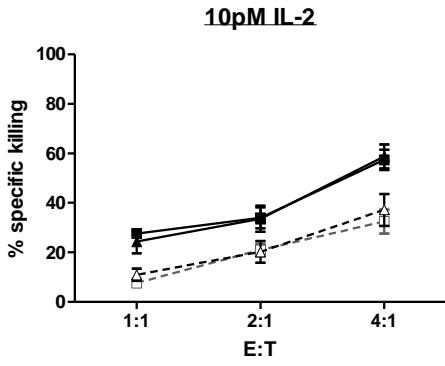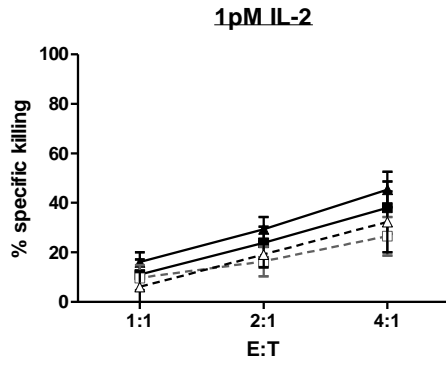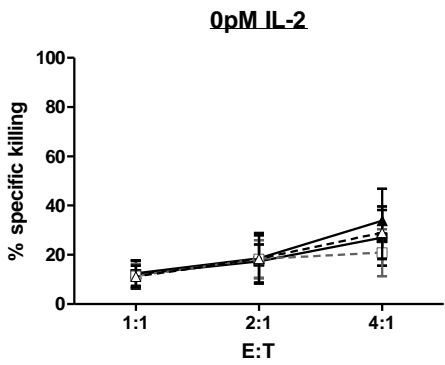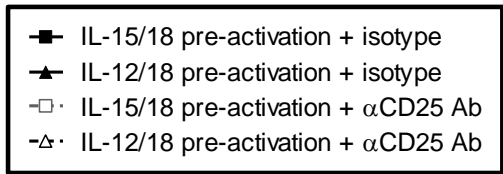

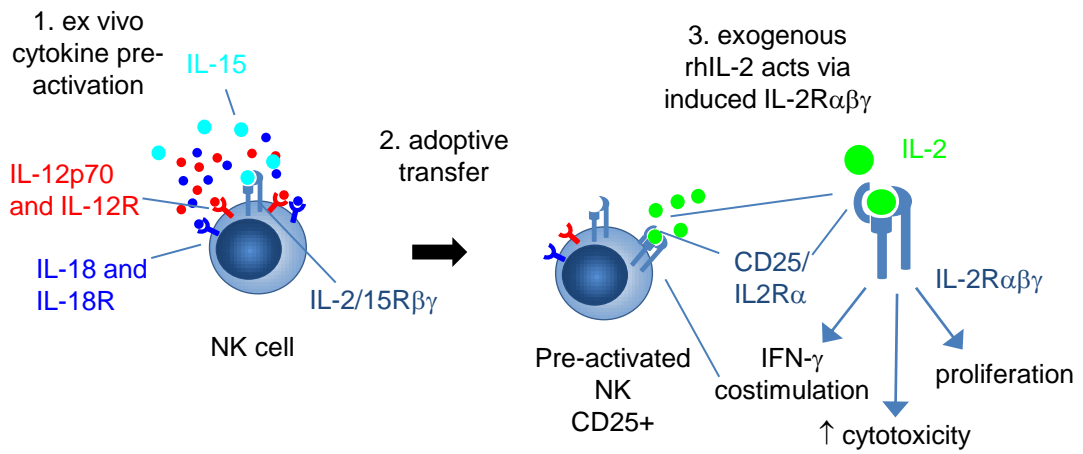

Supplement: NIHMS557838-supplement-01.pdf [file NIHMS557838-supplement-01.pdf]
